# Supplementary material for: Genomic comparative analysis of the environmental Enterococcus mundtii against enterococcal representative species
Source: PubMed Central journal article supplement (PMC4076982; doi:10.1186/1471-2164-15-489), 2014-06-18

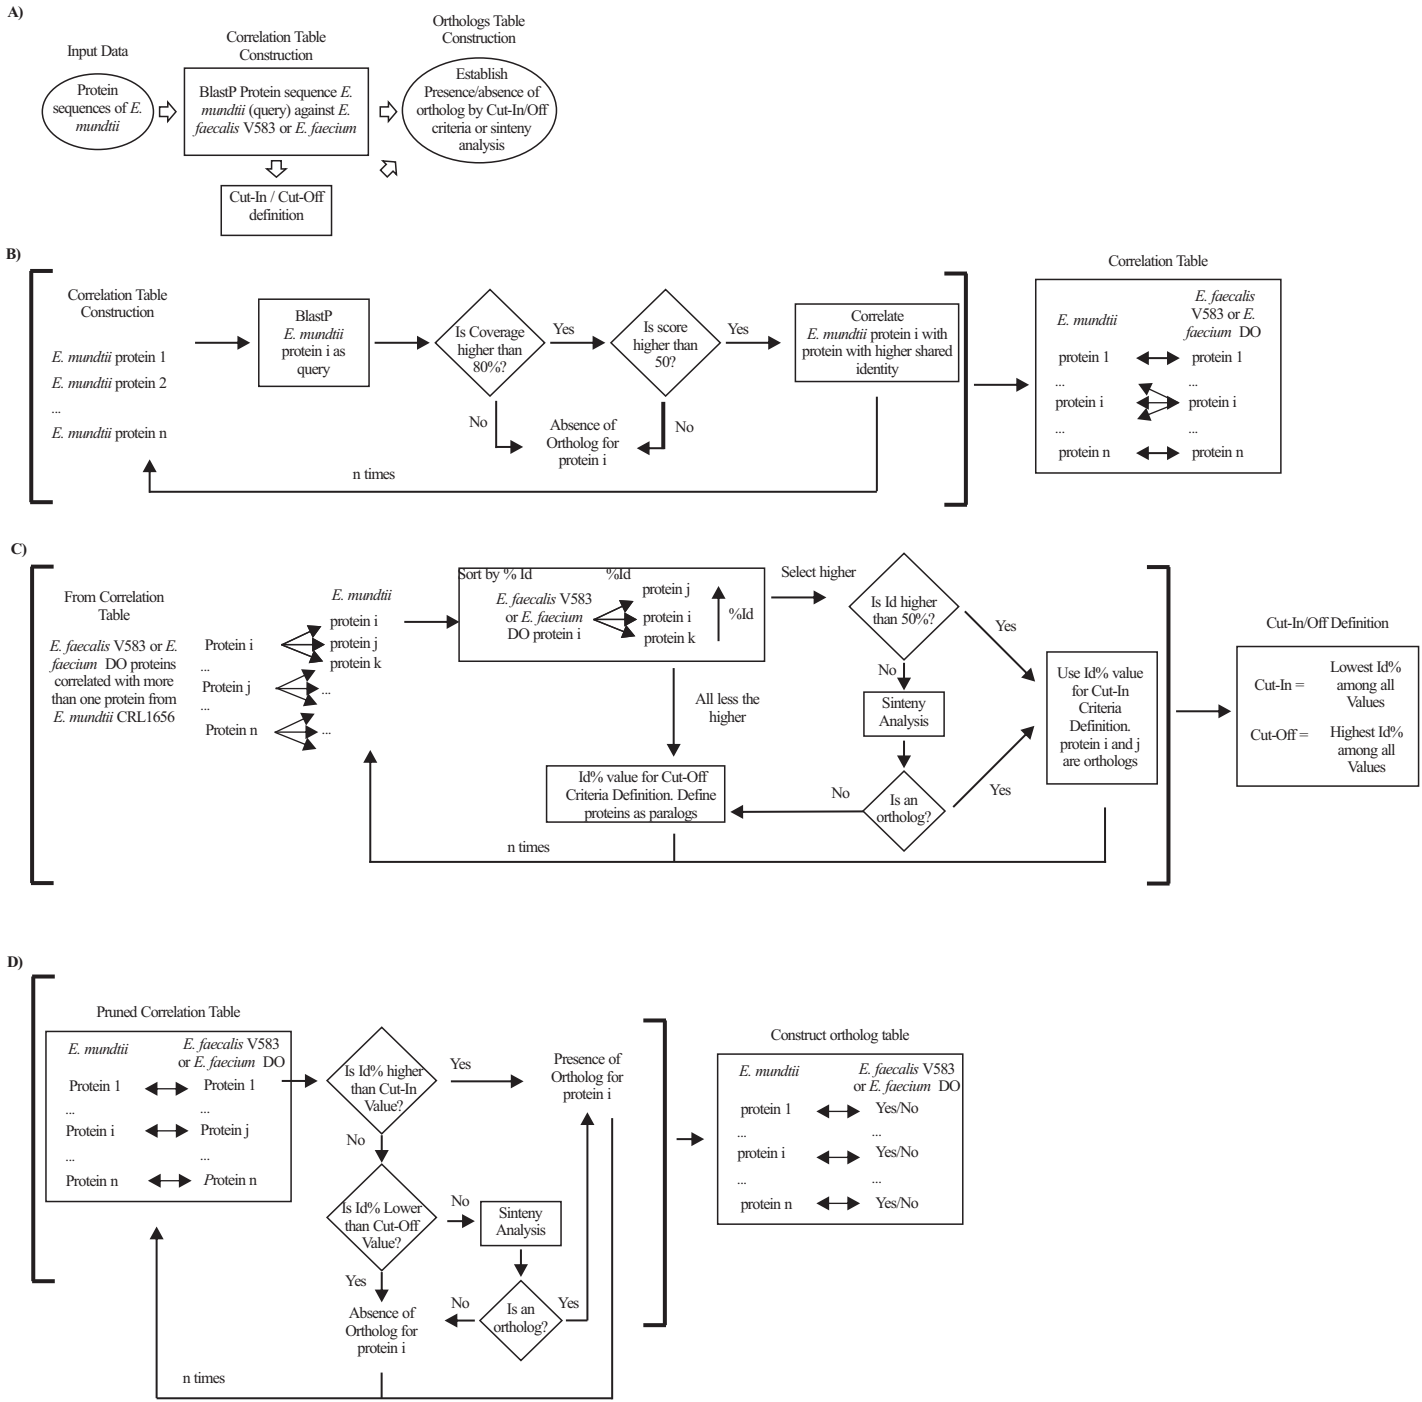

Supplement: 12864_2013_6171_MOESM1_ESM.pdf [file 12864_2013_6171_MOESM1_ESM.pdf]
